1 **Phage co-transport with hyphal-riding bacteria fuels bacterial invasion in water-**  
2 **unsaturated microbial ecosystems**

3 *Xin You<sup>1</sup>, René Kallies<sup>1</sup>, Ingolf Kühn<sup>2,5,6</sup>, Matthias Schmidt<sup>3</sup>, Hauke Harms<sup>1</sup>, Antonis*  
4 *Chatzinotas<sup>1,4,6</sup>, Lukas Y. Wick<sup>1,\*</sup>*

5 <sup>1</sup> Helmholtz Centre for Environmental Research - UFZ, Department of Environmental  
6 Microbiology, Permoserstr. 15, 04318 Leipzig, Germany

7 <sup>2</sup> Helmholtz Centre for Environmental Research - UFZ, Department of Community Ecology,  
8 Theodor-Lieser-Str. 4, 06120 Halle, Germany

9 <sup>3</sup> Helmholtz Centre for Environmental Research - UFZ, Department of Isotope  
10 Biogeochemistry, Permoserstr. 15, 04318 Leipzig, Germany

11 <sup>4</sup> Institute of Biology, Leipzig University, Talstr. 33, Leipzig 04103, Germany

12 <sup>5</sup> Institute of Biology / Geobotany and Botanical Garden, Martin Luther University Halle-  
13 Wittenberg, Halle, Germany

14 <sup>6</sup> German Centre for Integrative Biodiversity Research (iDiv) Halle-Jena-Leipzig, Deutscher  
15 Platz 5e, 04103 Leipzig, Germany

16 **KEYWORDS:** viruses, hyphosphere, hitchhiking, motility, biological invasions, microbial  
17 model system

18 \* Corresponding author. Phone: +49 341 235 1316, fax: +49 341 235 45 1316, e-mail:  
19 [lukas.wick@ufz.de](mailto:lukas.wick@ufz.de).

20 Abstract

21 Non-motile microbes enter new habitats often by co-transport with motile microorganisms.  
22 Here, we report on the ability of hyphal-riding bacteria to co-transport lytic phages and utilize  
23 them as ‘weapons’ during colonization of new water-unsaturated habitats. This is comparable  
24 to the concept of biological invasions in macroecology. In analogy to invasion frameworks in  
25 plant and animal ecology, we tailored spatially organized, water-unsaturated model  
26 microcosms using hyphae of *Pythium ultimum* as invasion paths and flagellated soil-bacterium  
27 *Pseudomonas putida* KT2440 as carrier for co-transport of *Escherichia* virus T4. *P. putida*  
28 KT2440 efficiently dispersed along *P. ultimum* to new habitats and dispatched T4 phages  
29 across air gaps transporting  $\approx 0.6$  phages bacteria<sup>-1</sup>. No T4 displacement along hyphae was  
30 observed in the absence of carrier bacteria. If *E. coli* occupied the new habitat, T4 co-transport  
31 fueled the fitness of invading *P. putida* KT2440, while the absence of phage co-transport led  
32 to poor colonization followed by extinction. Our data emphasize the importance of hyphal  
33 transport of bacteria and associated phages in regulating fitness and composition of microbial  
34 populations in water-unsaturated systems. As such co-transport mirrors macroecological  
35 invasion processes, we recommend hyphosphere systems with motile bacteria and co-  
36 transported phages as models for testing hypotheses in invasion ecology.

## 37 Introduction

38 To cope with the heterogeneous and highly changeable soil environment, microbes have  
39 evolved inter-microbial co-transport strategies to gain motility and colonize new habitats  
40 (reviewed by[1]). For instance, bacteria have been found to efficiently disperse along hyphae  
41 in soil. Fungi embody up to 75% of the subsurface microbial biomass. Their hyphae create  
42 fractal mycelial networks of  $10^2$  to  $10^4$  m per g of topsoil and efficiently explore heterogeneous  
43 air-filled habitats[2–4]. They thereby serve as pathways for bacteria to efficiently disperse  
44 (fungal highways[5, 6]), forage[7] and colonize new habitats [8, 9]. Hyphae however may  
45 reduce dispersal of intrinsically non-motile yet abundant ( $>10^8$  g<sup>-1</sup> soil[10]) soil virus-like  
46 particles as they have been shown to retain waterborne phages [11, 12]. Considering the slow  
47 diffusion ( $\sim 0.034$  mm/d[13]) and enhanced inactivation at dry conditions[14, 15], transport of  
48 phages seems particularly restricted in water-unsaturated habitats. Recent studies have revealed  
49 that phages in aquatic environments can adsorb to surfaces[16, 17], mucus[18], flagella[19] of  
50 non-host bacteria or even sheath surrounding them[20]. As hyphae are adapted to water-  
51 unsaturated habitats we here hypothesize that hyphae allow for phage co-transport with hyphal-  
52 riding bacteria and thereby fuel the fitness of invading bacteria in new regions (alien ranges)  
53 of water-unsaturated habitats. Co-transported phages, which are not specific to the carrier  
54 bacteria but specific to resident bacteria in alien ranges thereby may serve as “biological  
55 weapons”[21, 22] and increase the competitive ability and fitness of the invading carrier  
56 bacteria. Temperate phages integrated in bacterial genome (i.e. as prophages) have been  
57 suggested to serve as agents of ‘bacterial warfare’ [22–24]. In aquatic environments, lytic  
58 phages adsorbed to bacteria have been shown to facilitate phage infection of biofilm bacteria  
59 and to promote biofilm colonization by carrier bacteria [19]. In unsaturated environments like  
60 soil however, little is known about co-transport of phage with motile bacteria and its effect on  
61 bacterial population dynamics.

62 In analogy to the previously published MAcroecological Framework of Invasive Aliens  
63 (MAFIA[25]) we here tailored spatially organized microcosm systems to mimic the stages of  
64 the invasion process (i.e. transport, introduction, establishment, and spread) [25–28] of co-  
65 transported phages and bacteria in the hyphosphere. Unlike biological invasions in  
66 macroecological systems, our model system bears the advantage that all interacting species,  
67 their locations and location characteristics as well as invasion events are known and can be  
68 manipulated. In our model the ‘native range’ and the ‘invaded’ or ‘alien range’ are two agar

69 patches that are separated by an air gap. The air gap serves as a barrier that only can be  
70 overcome by bacterial movement along hyphae as invasion pathways crossing  
71 the 'native' and 'alien' ranges. Such water-unsaturated systems allow (i) to evaluate the  
72 transport efficiency of flagellated and non-flagellated bacteria as vectors to transport phages  
73 into alien ranges, and (ii) to quantify possible population effects of co-transported phages in  
74 the alien range. Our approach revealed that motile bacteria can help phages to migrate into  
75 water-unsaturated habitats and that phage co-transport can fuel the settlement and fitness of  
76 hyphal-riding bacteria in host pre-colonized alien ranges.

## 77 **Materials and methods**

### 78 **Strains, growth conditions and enumeration methods**

79 GFP-labeled wild type [29] soil bacterium *Pseudomonas putida* KT2440 (termed hereafter as  
80 WT) and its non-flagellated mutant  $\Delta film$  were used as carriers for phage co-transport.  $\Delta film$   
81 was obtained by allelic exchange with a truncated version of *film* [30] and used to test the role  
82 of flagella for phage sorption and phage co-transport. Both strains were kindly provided by  
83 Arnaud Dechesne (DTU). They were cultivated in LB medium on a gyratory shaker at 30°C  
84 and 150 rpm. For microcosm experiments, an overnight culture ( $OD_{600} \approx 2$ ) was washed once  
85 with PBS buffer (100 mM) and adjusted to reach an  $OD_{600} \approx 4$  ( $\approx 8 \times 10^6$  cell  $\mu L^{-1}$ ). Hyphae of  
86 the oomycete *Pythium ultimum* [31] were used as model dispersal networks. It was pre-grown  
87 on potato dextrose agar (PDA) at room temperature (RT) [32]. *Escherichia* virus T4 (T4) was  
88 selected as phage in co-transport experiments. T4 was propagated on its host *E. coli* (Migula  
89 1895) using the liquid broth method in DSM544 medium [33]. T4 and *E. coli* were purchased  
90 from Deutsche Sammlung von Mikroorganismen und Zellkulturen GmbH (DSMZ,  
91 Braunschweig, Germany). *E. coli* was cultivated in DSM544 medium at RT on gyratory shaker  
92 at 150 rpm (generation time =  $41 \pm 0.1$  min in the exponential phase). For microcosm  
93 experiments, 10  $\mu L$  of an overnight *E. coli* culture were transferred into 20 mL fresh DSM544  
94 medium and cultivated at 30°C until early exponential growth ( $OD_{600} \approx 0.4$ ).

95 Enumeration of *E. coli* and *P. putida* KT2440 were carried out by counting colony forming  
96 units (CFU) on LB agar incubated at 30°C overnight. When both strains were present in a  
97 sample, CFU of GFP-tagged *P. putida* KT2440 were counted with an epifluorescence  
98 microscope equipped with a black-and-white camera (AZ 100 Multizoom; Nikon, Amsterdam,  
99 Netherlands) under the GFP channel using NIS Elements software. Plaque forming unit (PFU)  
100 enumeration was done using a modified small-drop plaque assay technique as detailed earlier  
101 [34] allowing the double-layer counting plates to be incubated overnight at 37°C. The whole-  
102 plate plaque assay (cf. [35]) was also performed to crosscheck PFU counts for samples with  
103 zero PFU count by small-drop plaque assay.

### 104 **Determination of phage adsorption to bacteria**

105 Adsorption efficiencies of T4 to WT,  $\Delta film$  and *E. coli* were quantified at phage-to-bacteria  
106 ratios of 1, 0.1 and 0.01 in 6-8 replicates as described earlier [36]. In brief, suspensions of  
107 bacteria ( $\approx 10^8$  CFU  $mL^{-1}$ ) and T4 were incubated in PBS at RT for 1 h (15 min for T4 and *E.*

108 *coli*) and centrifuged at 8,000 x g at 4°C to pellet bacteria and adsorbed phages. Amounts of  
109 adsorbed phages were estimated by the loss of free phages after centrifugation; i.e. phage  
110 adsorption (%) calculated by the ratio of adsorbed phages to total phages prior to centrifugation.  
111 A phage-only control was also included to determine the stability and change of infectivity of  
112 T4 in the medium and during centrifugation.

### 113 **Quantification of phage co-transport by hyphal-riding bacterial carriers**

114 T4 co-transport with carrier bacteria was quantified in quintuplicate laboratory microcosms  
115 mimicking water-unsaturated soil in the presence and absence of hyphal networks (Fig 1a).  
116 The microcosms consisted of an agar patch A (PDA, 2% agar (w/v),  $1 \times w \times h = 1 \times 1 \times 0.6$   
117 cm) that was separated from an agar strip ( $1 \times w \times h = 2 \times 1 \times 0.6$  cm) by a 0.5 cm air gap. *P.*  
118 *ultimum* was pre-inoculated on agar patch A for 3-4 days to reach > 0.5 cm hyphal length prior  
119 to finally assembling the microcosms. The agar strip (that was split into equally sized patches  
120 B & C before harvesting, Fig. 2a & 3a) however was freshly prepared upon setting up the  
121 microcosm. It was made from minimal medium agar (MMA) to avoid bacterial growth and  
122 consisted of a top layer (MMA, 0.6% agar (w/v),  $h = 0.1$  cm) and a bottom layer (MMA, 2%  
123 agar (w/v),  $h = 0.5$  cm). All agar patches were placed in sterile Petri dishes. To analyze the  
124 transport of T4 along hyphae of *P. ultimum* in presence and absence of carrier bacteria, five  
125 different scenarios were used (Fig. 1b): (i) WT, (ii) WT + T4, (iii) T4, (iv)  $\Delta filM$ , and (v)  
126  $\Delta filM$  + T4. *P. ultimum* pre-grown agar patches (equal size as agar patch A) with T4 or WT +  
127 T4 were used to quantify hyphal effects on T4 infectivity. Inactivation of T4 on agar surfaces  
128 was studied on agar patches in the absence of *P. ultimum*. In scenarios (ii) and (v) bacteria with  
129 previously adsorbed phages were added. To do so, T4 ( $6 \times 10^9$  PFU mL<sup>-1</sup>) was co-incubated in  
130 PBS with WT or  $\Delta filM$  ( $\approx 8 \times 10^9$  cells mL<sup>-1</sup>) at RT for 1 h at 125 rpm and then centrifuged  
131 (8,000 x g for 10 min at 4°C) to discard free phages in the supernatant. The remaining pellet  
132 containing bacteria and adsorbed phages was washed once and concentrated by re-suspension  
133 in PBS to reach an inoculum density of OD<sub>600</sub> (estimation)  $\approx 20$ . Inocula with either bacterial  
134 cells ( $\approx 4 \times 10^{10}$  cells mL<sup>-1</sup>) or phages ( $\approx 6 \times 10^8$  PFU mL<sup>-1</sup>) in PBS served as controls. 1  $\mu$ L of  
135 the respective inoculum (i.e.  $\approx 4 \times 10^7$  bacteria or  $6 \times 10^5$  phages) was placed at 0.25 cm from the  
136 left edge of agar patch A. After inoculation the Petri dishes were sealed with Parafilm®, placed  
137 in a plastic container and incubated at 20°C in the dark. After 24, 48 and 72 h the microcosms  
138 were sacrificed and phage and bacteria numbers quantified on agar patches A, B & C by PFU  
139 and CFU. Isolation of phage and bacteria from agar was done as described previously [7]; i.e.

140 cut agar pieces were suspended in 3 mL PBS in glass tubes, vortexed at maximal speed for 1  
141 min and then sonicated (2 x 30 s with a break of 1 min). Phage-bacteria suspensions were 1:1  
142 extracted with chloroform in order to inactivate and remove bacterial biomass prior to PFU  
143 quantification.

#### 144 **Evaluation of population effects due to phage co-transport with hyphal riding bacteria**

145 Effects of phage co-transport on the populations of carrier bacteria invading an alien range  
146 occupied by competing bacteria were evaluated in five replicates in similar microcosms as  
147 described above. The double-layer of agar patches B & C, however, contained nutrient agar  
148 (DSM544) and the upper agar layer was densely populated by *E. coli* (Fig. 3a). Prior to the  
149 experiment, the thin upper agar layer of agar patches B & C was inoculated with *E. coli* ( $5 \pm$   
150  $0.5 \times 10^4$  CFU cm<sup>-2</sup>) and allowed to grow at RT for 3 h ( $\approx$  4 generations,  $2.3 \pm 0.1 \times 10^5$  CFU  
151 cm<sup>-2</sup>). Three different scenarios were studied using either (i) T4, (ii) WT, or (iii) WT +T4 as  
152 inocula. After 24, 48, and 72 h, all agar patches A, B & C were harvested and phages and  
153 bacteria quantified as described above.

#### 154 **Helium Ion Microscope Imaging**

155 Helium Ion Microscope (HIM) imaging was performed with suspensions from phage-bacteria  
156 adsorption assays and surfaces of agar patches B after invasion of phage-carrying WT *P. putida*  
157 KT2440 into *E. coli* populations. HIM imaging of surfaces of T4 plaques on a lawn of *E. coli*  
158 served as control. Suspension containing phage-bacteria associations from the adsorption  
159 assays were mixed at a ratio of 1:1 with 2% (v/v) paraformaldehyde in 0.2 M sodium-  
160 cacodylate buffer (pH = 7.4) and allowed to stand for 2 h for chemical fixation. The suspension  
161 was then filtrated onto 0.22- $\mu$ m pore-size polycarbonate filter papers (Merck-Millipore) using  
162 a Sartorius hand-filtration device. The filter papers were rinsed twice for 5 min with Na-  
163 cacodylate buffer to remove salts and debris. The samples were dehydrated in a graded aqueous  
164 ethanol series (30%, 50%, 70%, 80%, 90%, and 100% EtOH) and critical point dried. To  
165 observe phage-bacteria associations on agar surfaces, the agar patches were submersed in Petri-  
166 dishes in the fixative for 2 h (cf. above). The fixative was then gradually exchanged using a  
167 graded aqueous ethanol series (>50% fixative replacement each time to avoid material loss)  
168 and the sample finally critical point dried. The dried samples were mounted onto standard stubs  
169 for electron microscopy using a conductive silver epoxy glue and imaged by a Zeiss Orion  
170 NanoFab (Zeiss, Peabody, MA, USA) scanning helium ion microscope using an ion-landing-

171 energy of 25 keV, a 10- $\mu\text{m}$  aperture and an Everhard-Thornley-type secondary electron  
172 detector. To achieve both high lateral resolution ( $\leq 2$  nm) and contrast, the beam current was  
173 set between 0.08 pA (high magnification) and 0.25 pA. Charge compensation during imaging  
174 was achieved with an electron flood-gun operated in line-flooding mode. In order to avoid  
175 beam damage and to allow for efficient charge compensation the dwell time of the beam on a  
176 pixel was kept between 0.5 -1.0  $\mu\text{s}$ .

## 177 **Data analysis and statistics**

178 The time-dependent transport rate ( $R_i$ ; shown in eq.1) of phages ( $R_p$ , PFU  $\text{cm}^{-1} \text{d}^{-1}$ ) or bacteria  
179 ( $R_b$ , CFU  $\text{cm}^{-1} \text{d}^{-1}$ ) was obtained by normalizing the number of phages transported ( $N_p$ , PFU)  
180 or bacteria transported ( $N_b$ , CFU) to the dispersal distance ( $d$ , cm) and the time ( $t$ , d) until  
181 harvesting. Because T4 got rapidly inactivated on agar surfaces (99% loss of PFU in  $< 24$  h,  
182 Fig. S2a) and subsequent low phage numbers were elusive to direct quantification,  $N_p$  was  
183 approximated by the difference of phages counted at the point of inoculation (i.e. agar patch A)  
184 in the absence and presence of carrier bacteria. This approach was possible as the presence of  
185 either *P. ultimum* or *P. ultimum* and *P. putida* KT2440 co-cultures did not influence T4  
186 infectivity and enumeration (Fig. S2c).

$$187 \quad R_i = \frac{N_i}{d \times t} \quad \text{eq.1}$$

188 For co-transported phages, time-dependent transport capacity ( $C_p$ , PFU bacteria $^{-1}$ ) and  
189 transport efficiency ( $E_p$ , %). reflects the average number of phages transported by a single  
190 bacterium and  $E_p$  the fraction of phages dispatched by carrier bacteria. For calculation details,  
191 please refer to extended materials and methods in SI.

192 To evaluate the effect of phage co-transport on bacterial or phage populations at time  $t$ , the  
193 absolute fitness ( $W_i$ )[37] of a given population  $i$  was calculated using eq. 2.  $W_i$  is the time  
194 dependent ratio of the population size (bacteria or phages) on given agar patches in the presence  
195 of *E. coli* ( $N_i^*$ , CFU or PFU) and absence of *E. coli* ( $N_i$ , CFU or PFU).  $W > 1$  and  $W < 1$  indicate  
196 an increase and a decrease of the population size, while  $W = 0$  refers to population extinction  
197 (c.f. extended materials and methods in SI for calculation details).

$$198 \quad W_i = \frac{N_i^*}{N_i} \quad \text{eq.2}$$

199 Data were plotted as transparent dots and statistics were displayed as median (circle) with 95%  
200 confidential interval (95CI, vertical bar) or boxplot notches as modified from [38]. The 95CI



201 was determined by bootstrapping (1000 samples) and derived from the 2.5<sup>th</sup> and 97.5<sup>th</sup>  
202 percentile[39]. When the 95CIs of two conditions do not overlap, it indicates a statistical  
203 difference between these two conditions[40].

## 204 Results

### 205 Adsorption of T4 phage to WT and $\Delta filM$

206 Being a prerequisite for phage co-transport with carrier bacteria we tested the adsorption of T4  
207 phages to the flagellated WT of *P. putida* KT2440 and its non-flagellated  $\Delta filM$  mutant. We  
208 found that 13 - 62% of T4 particles adsorbed to the non-host WT with the highest adsorption  
209 (62%) observed at a phage to bacteria ratio of 1 (Fig. S1a). No statistically significant  
210 differences ( $P > 0.05$ ) between T4 adsorption to flagellated WT and  $\Delta filM$  were observed at  
211 this phage to bacteria ratio (Fig. S1b). Adsorption to WT was thus consistently lower and more  
212 variable than to the host strain *E. coli* (68 - 84%; Fig. S1a). T4 adsorption was further evidenced  
213 by HIM visualization. It revealed capsid-driven adsorption of T4 (Figs. S1d&e) to the surface  
214 of *P. putida* KT2440 leaving the phages' tails unattached (Fig. 1b). This is in contrast to T4  
215 adsorption to host *E. coli*, where perpendicular adsorption with phage tails bound to bacterial  
216 surfaces was found (Fig. 1 & Fig. S1c).

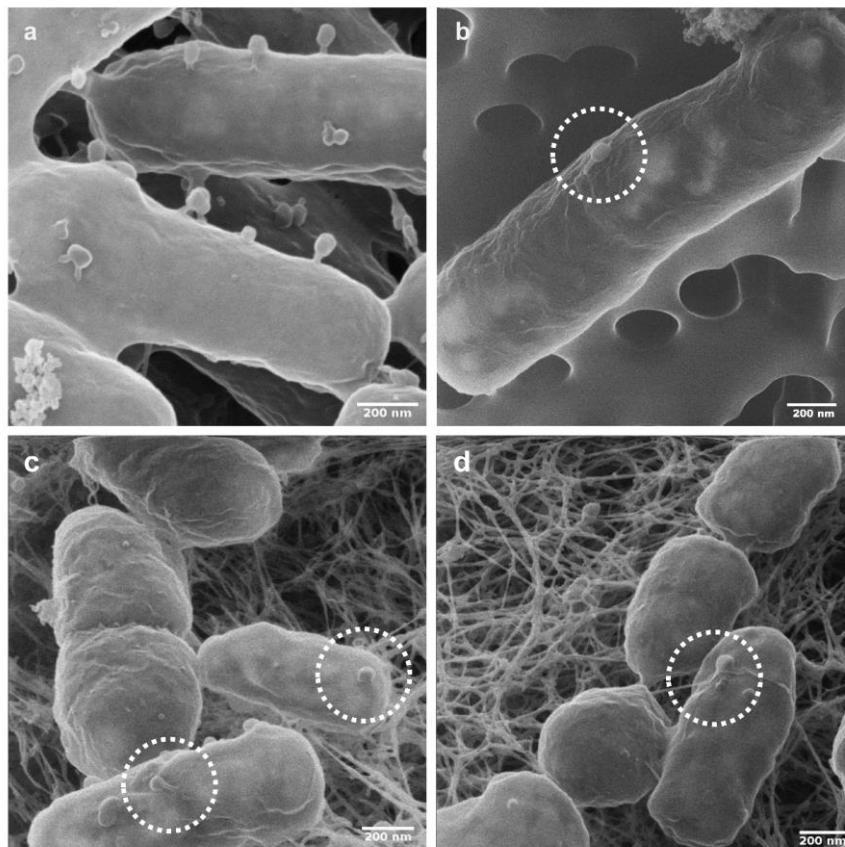

217

218 **Figure 1.** Helium ion microscopy (HIM) visualization of T4 phage adsorption to *E. coli* host and non-host *P.*  
219 *putida* KT2440 cells. **Figs 1a&b** visualize cells from phage adsorption experiments (cf. materials and methods)  
220 reflecting tail-mediated adsorption to *E. coli* host cells (**Fig. 1a**) and capsid-driven adsorption to non-host *P. putida*  
221 KT2440 (**Fig 1b**). **Figs 1c&d** visualize tail- (**Fig. 1c**) and capsid-driven (**Fig. 1d**) phage adsorption to biofilm

222 cells growing on agar patch B on day 2 in experiments evaluating population effect of T4 co-transport with *P.*  
223 *putida* KT2440 (cf. Fig. 3).

#### 224 *Effect of hyphal-riding bacteria on phage co-transport*

225 In analogy to the different stages of the plant or animal invasion processes [25, 26] we  
226 developed a spatially organized microcosm system to evaluate phage co-transport with hyphal-  
227 riding bacteria invading new habitats (i.e. agar patches B & C; Fig. 2a). To challenge the role  
228 of bacterial motility for phage co-transport, we used flagellated WT and the non-flagellated  
229  $\Delta filM$  mutant in five different scenarios (Fig. 2b): (i) T4, (ii)  $\Delta filM$ , (iii) WT, (iv)  $\Delta filM$  + T4,  
230 and (v) WT + T4. No airborne transport of phages was observed in the microcosms (Fig S2b).  
231 As T4 infectivity got rapidly lost on agar surfaces (> 99% loss within 24 h, Fig. S2a) preventing  
232 reliable enumeration on agar patches B & C, phage transport rates ( $R_p$ ; eq. 1) were calculated  
233 by differences of phage counts on agar patch A in all scenarios. Contrary to our observation on  
234 sterile agar surfaces (Fig. S2a) T4 maintained its infectivity up to two days when placed on  
235 agar patches covered by *P. ultimun* (Fig 1c). No reduction in T4 counts in the absence of  
236 bacteria or in presence of  $\Delta filM$  was observed over two days pointing at negligible diffusion  
237 of viable phages or phage co-transport by  $\Delta filM$ . Similarly, inoculation of WT + T4 on isolated  
238 *P. ultimun* agar (i.e. no WT exportation; Fig S2c) showed no reduction in T4 counts (Fig. S2c).  
239 By contrast, inoculation of WT + T4 on interlinked *P. ultimun* agar (i.e. WT exportation  
240 allowed; Fig. 2a) resulted in a significant (> 65%) reduction of T4 counts after two days and a  
241 transport efficiency of  $E_p \approx 60\%$  (Fig. 2e). The phage transport rates ( $R_p \approx 10^5$  PFU  $cm^{-1} d^{-1}$ , Fig.  
242 1d) thereby coincided with hyphal dispersal rates of the WT ( $R_b \approx 1.4 \times 10^5$  CFU  $cm^{-1} d^{-1}$ ; Fig.  
243 1d) suggesting an apparent transport capacity of  $C_p \approx 0.6$  PFU bacteria $^{-1}$  after 2 days (Fig. 1g).  
244 After three days a 10-fold decreased T4 transport rate ( $R_p \approx 1.4 \times 10^4$  PFU  $cm^{-1} d^{-1}$ , Fig. 1d)  
245 and a 20-fold reduced apparent T4 transport capacity ( $C_p \approx 0.03$  PFU bacteria $^{-1}$ ) were observed.  
246 This is likely due to growth of WT bacteria and/or the inability of the WT progeny on agar  
247 patch A to get into contact with T4 phages. Transport rates of WT bacteria were similar  
248 regardless of the presence of T4 (Fig. 2e).

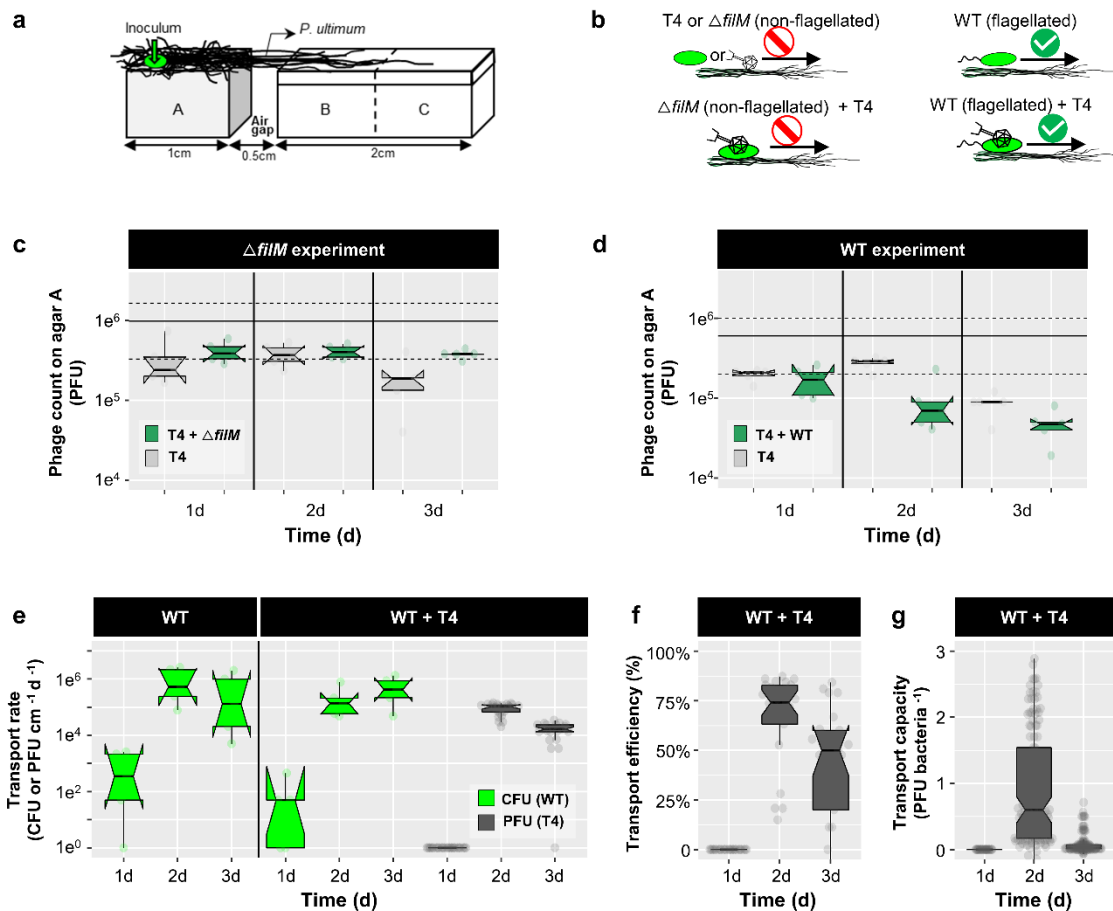

249

250 **Figure 2.** Co-transport of T4 with *P. putida* KT2440 (WT or non-flagellated  $\Delta filM$ ) along hyphae of *P. ultimum*.  
 251 **Fig 2a.** Scheme of the microcosm setup specifying microbial inoculation points and the spatial arrangement and  
 252 dimensions of agar patches A, B & C. **Fig 2b.** Experimental scenarios and observed results. Upper left panel: T4  
 253 or  $\Delta filM$  do not disperse along hyphae over the air-gap. Lower left panel:  $\Delta filM$  does not transport T4 along  
 254 hyphae. Upper right panel: WT disperse along hyphae. Lower right panel: WT disperses along hyphae and  
 255 transports T4 along hyphae over the air-gap. **Figs 2c&d.** T4 counts on agar patch A after one day in the absence  
 256 and presence of  $\Delta filM$  (**Fig. 2c**) and WT (**Fig. 2d**). The solid and dashed lines indicate the median of 5 replicates  
 257 and its 95CI of the initial inocula. **Fig 2e.** Time dependent cumulative transport rates of WT ( $R_{WT}$ , in green) and  
 258 phages ( $R_{T4}$ , in grey) to agar patches B&C (cf. eq. 1). **Fig 2f.** Time dependent phage transport efficiency in  
 259 presence of WT ( $E_{T4}$ ). **Fig 2g.** Time dependent phage transport capacity of WT ( $C_{T4}$ ). Data on T4 transport by  
 260  $\Delta filM$  are not shown as no transport was observed. Notches of the boxes represent 95CI of 5 replicates. If notches  
 261 of two conditions do not overlap, it indicates a statistical difference between the two conditions.

## 262 *Effects of phage co-transport on bacterial invasion and invader fitness*

263 To evaluate the community effect of T4 co-transport with hyphal-riding WT, agar patches B &  
 264 C were covered with  $2.3 \pm 0.1 \times 10^5$  CFU  $cm^{-2}$  of *E. coli* as local host bacteria of T4 (Fig. 3a).  
 265 Development of T4, WT and *E. coli* counts was quantified over time in four different scenarios  
 266 (cf. Fig. 3b): (i) PBS only, (ii) WT, (iii) T4, and (iv) T4 + WT. In the absence of WT, no  
 267 diffusion of infectious T4 along hyphae to agar patches B & C was observed at any time (Fig.

268 3c). In presence of WT, however,  $\sim 10^5$  PFU and  $\sim 10^4$  PFU were recovered from agar patches  
269 B & C after 1 day leading to a 45-180-fold increased phage abundance (Fig. 3c;  $45 < W_{T4} < 180$   
270 as defined by eq. 2). The presence of T4 went along with HIM-detectable bacterial lysis of *E.*  
271 *coli* (Fig. S3e) indicating previous phage lysis on day 1. No T4, however, were detected on day  
272 two (Fig. 3c) despite HIM-detectable phages adsorbing to bacterial surfaces either in tail-  
273 mediated perpendicular (Fig. 1c) or capsid-mediated coaxial positions (Fig. 1d). Tail-mediated  
274 adsorption thereby points at an infection of host cells (Fig. 1a) while capsid-mediated  
275 adsorption may refer to unspecific interaction with non-host cells (Fig. 1b). In the absence of  
276 T4 the carrier WT cells invaded and established on agar patches B & C in the first 24 h ( $W_{WT} >$   
277 930) accounting for 0.08-0.39% of all bacteria. Thereafter WT got strongly inhibited ( $W_{WT} <$   
278 0.06) and comprised less than 0.01% of the population; this, despite a constantly growing WT  
279 population on agar patch A ( $W_{WT} > 1$ ) and a likely on-going WT invasion from agar patch A  
280 (Fig 3c).

281 By contrast, T4 co-transport with WT promoted invasion and fitness of the carrier bacteria after  
282 a delay of one day: on agar patch B the absolute fitness of WT increased from  $W_{WT} \leq 1$  (1 d)  
283 to  $W_{WT} = 556$  ( $\approx 5 \times 10^8$  CFU) at  $t = 3$  d (Fig 3c). On agar patch C the WT fitness changed from  
284  $W_{WT} < 1$  ( $t = 1-2$  d) to  $W_{WT} > 1$  after 3 days. After 3 days WT accounted for  $\approx 14\%$  and 1% of  
285 the total bacterial population on agar patches B and C, resp. (Fig. 3d). Epifluorescence  
286 microscopy analysis thereby revealed that gfp-labeled WT established best in the vicinity of  
287 the hyphae (Figs. S3b & c), suggesting highest phage-clearance effects on resident *E. coli* in  
288 the hyphosphere. Invasion of WT, however, had no negative impact on the abundances of *E.*  
289 *coli* cells in agar patches B & C (Fig. 3d). We further checked the effect of phage co-transport  
290 on overall phage counts and abundances of host and carrier bacteria in the microcosms (i.e.  
291 agar patches A, B & C) (Fig. S4). While co-transport did not influence T4 abundances (Fig.  
292 S4a), it clearly enhanced the abundance of WT (Fig. S4b), yet not influence the *E. coli*  
293 abundances (Fig S4c).

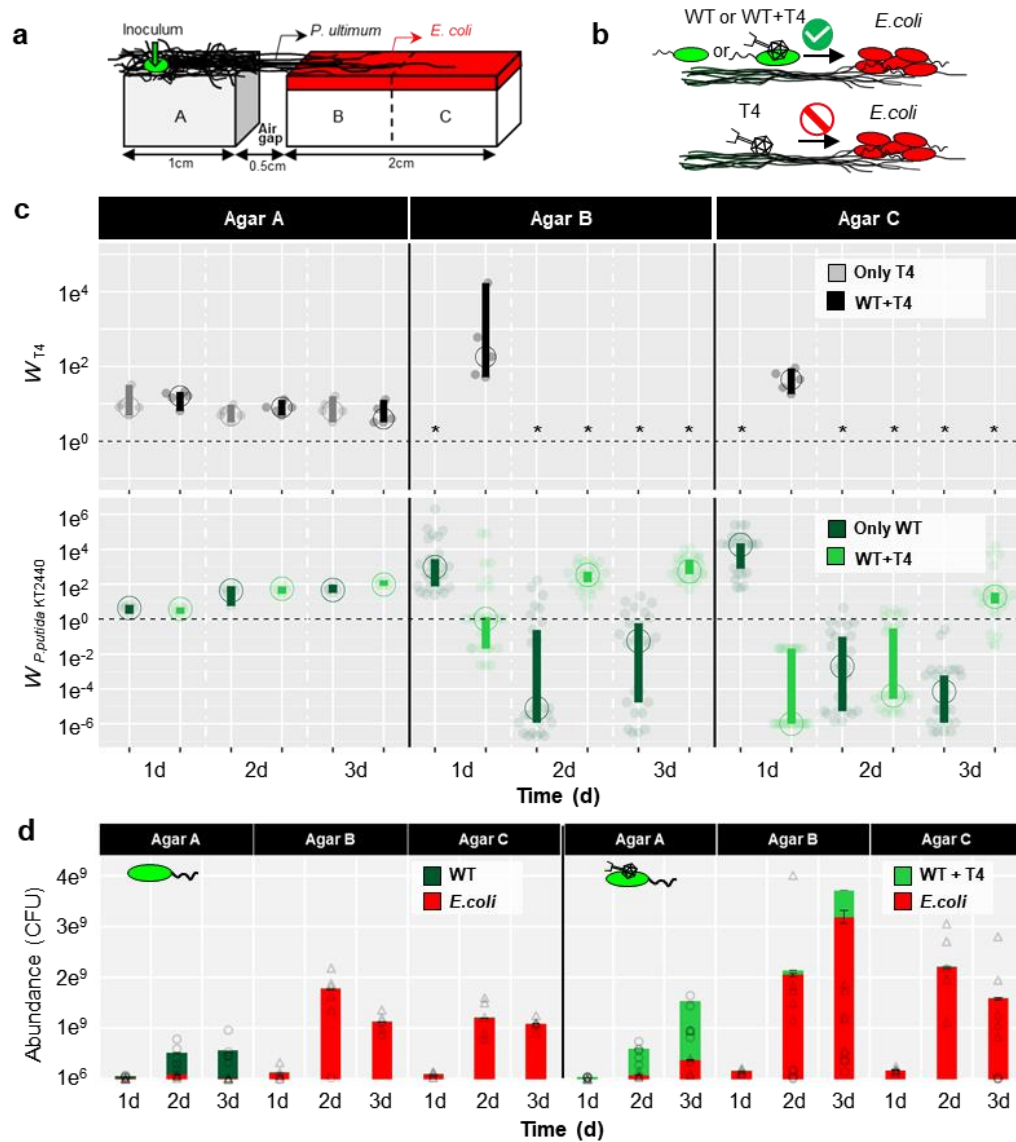

294

295 **Figure 3.** Effects of T4 co-transport with flagellated *P. putida* KT2440 (WT) along hyphae of *P. ultimum* phage,  
 296 *E. coli* and WT counts on agar patches A-C. **Fig 3a.** Scheme of the microcosm setup specifying microbial  
 297 inoculation points and pre-colonized *E. coli* on agar patches A, B & C. **Fig 3b.** Overview of the scenarios for  
 298 evaluating invasion. Upper panel: T4 co-transport with WT along hyphae to an *E. coli* covered alien range (i.e.  
 299 agar patches B & C). WT disperses along hyphae to the *E. coli* pre-colonized alien range. Lower panel: T4 is not  
 300 able to disperse along hyphae to the alien range. **Fig 3c.** Time dependent absolute fitness of T4 ( $W_{T4}$ ) and of *P.*  
 301 *putida* KT2440 ( $W_{WT}$ ) on agar patches A, B & C in presence and absence of phage-bacterial co-transport. Dashed  
 302 line represents no change of the population size ( $W_i = 1$ ) and \* indicates that no PFU were detected. The vertical  
 303 bars represent 95CI calculated from 5 biological replicates. If vertical bars of two conditions do not overlap, it  
 304 indicates a statistical difference between the two conditions. **Fig 3d.** Abundance of *E. coli* and WT populations on  
 305 agar patches A, B & C with and without T4 co-transport (triangles and circles represented individual data points  
 306 of *E. coli* and *P. putida* KT2440 in 5 replicates). Please note that abundances of WT <  $10^8$  CFU (e.g. observed in  
 307 the case of WT + T4" on 3d) are not visible due to the plot scale.

## 308 Discussion

### 309 *Phage co-transport with hyphal-riding bacteria*

310 Although described for aquatic environments [19, 41, 42], little is known on viral co-transport  
311 with non-host microorganisms in vadose habitats; even though adsorption and subsurface co-  
312 transport of nano-colloids with organic or biological materials has been described nearly two  
313 decades ago [43]. Here, we show that *Escherichia* virus T4 can adsorb to the hyphal-riding soil  
314 bacterium *P. putida* KT2440 (Fig. S1). It thereby gets efficiently dispersed in water-unsaturated  
315 environments (Fig. 2) and invades new habitats (Fig. 2a) even if this involves crossing air-  
316 filled spaces (Fig 1c). No diffusion of T4 along hyphae of *P. ultimum* and no T4 co-transport  
317 with the non-flagellated  $\Delta filM$  was detected. Flagellar mobility hence seems to be a driver for  
318 efficient phage transport by bacteria. Although a few studies have reported on preferential  
319 adsorption of phages to bacterial flagella [19], we found similar efficiencies of T4 adsorption  
320 to flagellated WT and non-flagellated  $\Delta filM$  (Fig S1). T4 adsorption to the bacterial cell surface  
321 rather than to flagella was also confirmed by HIM imaging. Microscopy suggested that capsid-  
322 mediated sorption to cells left the phage tails unattached. This allows adsorbed phages to  
323 remain infectious, i.e. transferable to thermodynamically favored adsorption to host cells [44].  
324 We chose T4 as model phage as it is known to adsorb to cell surfaces and to be less adsorptive  
325 than smaller phages [45, 46]. T4 adsorption to and co-transport by carrier bacteria hence may  
326 therefore lead to conservative estimates for phage adsorption and co-transport. For instance, a  
327 recent study using *Bacillus cereus* as a model bacterium for waste water has shown its ability  
328 to adsorb phages of different morphologies from 10 viral families [19]. T4, furthermore, was  
329 also found to adsorb to the soil bacterium *P. fluorescence* Lp6a despite of its highly distinct  
330 physico-chemical surface properties [47] from *P. putida* KT2440 (Fig S1a). As hyphal-riding  
331 bacteria are widespread in many environments (e.g. soil [48–50], the vicinity of roots [6, 51]  
332 and cheese[52]), we hence speculate that other combinations of phages with hyphal-riding  
333 carrier bacteria may also lead to phage co-transport. As phage co-transport with non-host  
334 bacteria can take place over days (Fig. 2) one may speculate that such co-transport may be  
335 more efficient than recently reported co-transport of phages with their host cells (‘virocells’)  
336 during the (typically small, e.g.  $\geq 20$  min for T4) latent period [53].

### 337 *Benefits of phage co-transport for bacterial carriers*

338 Our data show that T4 co-transport fosters fitness of hyphal-riding WT cells if invading alien  
339 ranges occupied by resident T4 host cells (Figs. 3 & 4). Over 48 h the invasion and colonization  
340 of WT occurred in close vicinity (i.e. in the hyphosphere) of colonizing hyphae acting as  
341 preferential transport pathways for bacteria carrying adsorbed lytic phages (Fig. 4). Co-  
342 transported phages provided significant fitness gain for carrier bacteria in the alien range after  
343 one day (Fig. 3c). Yet, no phages could be detected at later stages although HIM analyses  
344 clearly revealed both phage particles adsorbing to bacterial surfaces (Figs. 1c & d) and lysed  
345 *E. coli* cells (Fig. S3e) in the hyphosphere (Fig. S3b). Such increase of the T4 abundance during  
346 initial WT carrier invasion may have been promoted by high accessibility of *E.coli* cells to T4  
347 introduced by hyphal-riding WT. Lysis of host cells coupled with exponential growth of carrier  
348 WT cells in the hyphosphere however may have reduced *E. coli* cell density, and, hence, T4  
349 accessibility and subsequent host infection. Similar phenomenon has been reported in spatially  
350 organized biofilms with two *Pseudomonas* strains, where the growth of the phage insensitive  
351 strain largely reduced the phage abundance by blocking their access to their host [54]. Likewise,  
352 on-going T4 transport may have triggered anti-phage mechanisms in the *E. coli* biofilms [55,  
353 56]. Our data indicate that initial WT invasion in the absence of T4 was more efficient ( $W_{WT} >$   
354  $930$ ) than in its presence ( $W_{WT} \approx 1$ ). As transport rates of WT and WT + T4 did not differ (Fig.  
355 2e,  $P > 0.05$ ), we speculate that phage infection may lead to growth inhibition of ‘bystander  
356 bacteria’ as demonstrated in *Enterococcus faecalis* [57]. The hyphal-riding invader WT cells  
357 however could not establish in the absence of T4 - likely due to higher fitness of resident *E.*  
358 *coli* – and got eliminated after initial colonization success (Figs. 3c&d; Fig. 4).

### 359 *Microbial co-transport as a model for studying biological invasion*

360 In analogy to the MAcroecological Framework of Biological Invasions [25, 26], we tailored a  
361 microbial system to study transport, introduction, establishment and spread of hyphal-riding  
362 bacteria in presence and absence of co-transported phages (Fig 4). The hyphosphere of fungi  
363 and oomycetes has been described to serve as pathway and scaffold for microbial transport  
364 (‘logistics’[9]) and evolution[58]. The role of ‘hitchhiker’ [1] phages as ‘weapon-like’ [21]  
365 promoters of microbial invasions and population dynamics in vadose habitats has not been  
366 described. Our findings hence may resemble the concept of “novel weapon” (e.g. biochemical  
367 possessed by invading species that is fatal to resident species) in plant ecology [21] or reflect  
368 the spread of infectious disease in animal ecology (e.g. Grey squirrely being vectors for squirrel  
369 pox infecting European red squirrels [59]). Such mechanisms have been difficult to be directly



370 demonstrated in ecology, mostly due to limited data on population dynamics or inadequate  
 371 observation time crossing multiple generations, especially with the respect to wild life  
 372 populations[60]. By adapting spatially organized microbial model systems, those difficulties  
 373 can be easily solved: multiple fast and reliable quantification methods, ranging from culture-  
 374 based enumeration (this study) to molecular methods (e.g. qPCR) or –omics approaches, can  
 375 be employed to resolve the microbial population dynamics. Hundreds of generations (e.g. >  
 376  $10^4$  generation of *E. coli* within 3 days) can be covered in a few days and spatial organization  
 377 can be overseen by microscopic imaging. In our study for example we evidenced the effects of  
 378 phage-bacteria co-transport on invasion success in experiments as short as three days. In such  
 379 a system, we can easily manipulate not only the stages of the invasion process e.g.,  
 380 transport/pathway (transport rates  $R_i$ , capacity  $C_i$ , efficiency  $E_i$ ) or introduction [25-28], by  
 381 changing the barrier to be overcome, as well as the medium (e.g., hyphae) to cross this barrier.  
 382 We can also manipulate species traits (by choosing bacteria and/or phages with different traits),  
 383 location characteristics (e.g., changing nutrient content as well as adding non-beneficial  
 384 substances such as poisons), event characteristics (e.g., propagule pressure by changing  
 385 population sizes  $N$ ) and any of their interactions affecting fitness  $W$ . As phage interaction with  
 386 non-host bacteria seems to be a widespread mechanism[19], future exploration of hyphae-  
 387 associated phage-bacteria pairs will not only resolve phage activities in regulating hyphosphere  
 388 life, but also offer a powerful tool for testing hypotheses of invasion ecology at large scale (e.g.  
 389 regarding spatial and trait relationships of alien biota) in spatially tailored microbial model  
 390 systems.

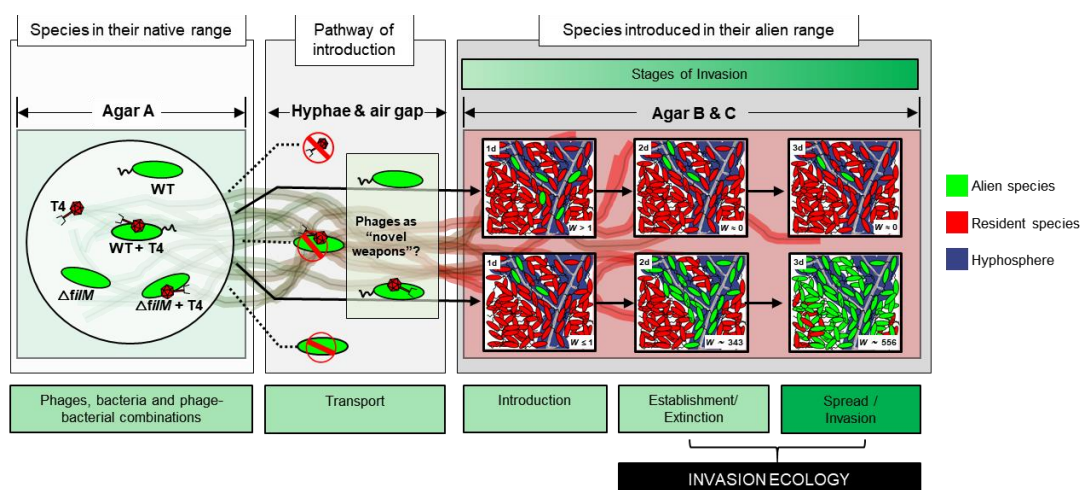

391

392 **Figure 4.** Equivalence between the MAcroecological Framework of Invasive Aliens (MAFIA) and the  
 393 microsphere model system used in this study (cf. Fig. 3a). Based on the background sketch of the microsphere  
 394 model system, the main findings of the study are summarized and illustrated in the flow chart. Boxes and contents  
 395 are directly mirrored from the recently published MAcroecological Framework of Invasive Aliens[25] built upon  
 396 [26–28].

397 **ACKNOWLEDGMENTS**

398 This study is part of the Collaborative Research Centre AquaDiva of the Friedrich Schiller  
399 University Jena, funded by the Deutsche Forschungsgemeinschaft (DFG, German Research  
400 Foundation) - SFB 1076 - project number 218627073 and the Helmholtz Centre for  
401 Environmental Research - UFZ. The authors wish also to thank Maria Fabisch and Anke  
402 Hädrich for great coordination of the CRC AquaDiva and iRTG AquaDiva. The authors are  
403 thankful for the use of the helium-ion microscope at the Centre for Chemical Microscopy  
404 (ProVIS) at UFZ Leipzig, which is supported by European Regional Development Funds  
405 (EFRE—Europe funds Saxony) and the Helmholtz Association.

406 **SUPPLEMENTARY MATERIAL**

407 Supporting Information is available and contains 7 pages with 4 figures.

408 **CONFLICT OF INTEREST**

409 The authors declare that the research was conducted in the absence of any commercial or  
410 financial relationships that could be construed as a potential conflict of interest.

411 **References**

- 412 1. Muok AR, Briegel A. Intermicrobial Hitchhiking: How Nonmotile Microbes Leverage  
413 Communal Motility. *Trends Microbiol* 2021.
- 414 2. Otten W, Hall D, Harris K, Ritz K, Young IM, Gilligan CA. Soil physics, fungal  
415 epidemiology and the spread of *Rhizoctonia solani*. *New Phytol* 2001; **151**: 459–468.
- 416 3. Sun B, Chen X, Zhang X, Liang A, Whalen JK, McLaughlin NB. Greater fungal and  
417 bacterial biomass in soil large macropores under no-tillage than mouldboard ploughing. *Eur*  
418 *J Soil Biol* 2020; **97**: 103155.
- 419 4. Harms H, Schlosser D, Wick LY. Untapped potential: exploiting fungi in bioremediation of  
420 hazardous chemicals. *Nat Rev Microbiol* 2011; **9**: 177.
- 421 5. Kohlmeier S, Smits THM, Ford RM, Keel C, Harms H, Wick LY. Taking the Fungal  
422 Highway: Mobilization of Pollutant-Degrading Bacteria by Fungi. *Environ Sci Technol*  
423 2005; **39**: 4640–4646.
- 424 6. Jansa J, Hodge A. Swimming, gliding, or hyphal riding? On microbial migration along the  
425 arbuscular mycorrhizal hyphal highway and functional consequences thereof. *New Phytol*  
426 2021; **230**: 14–16.
- 427 7. Otto S, Bruni EP, Harms H, Wick LY. Catch me if you can: dispersal and foraging of  
428 *Bdellovibrio bacteriovorus* 109J along mycelia. *ISME J* 2017; **11**: 386–393.
- 429 8. Kjeldgaard B, Listian SA, Ramaswamhi V, Richter A, Kiesewalter HT, Kovács ÁT. Fungal  
430 hyphae colonization by *Bacillus subtilis* relies on biofilm matrix components. *Biofilm* 2019;  
431 **1**: 100007.
- 432 9. Deveau A, Bonito G, Uehling J, Paoletti M, Becker M, Bindschedler S, et al. Bacterial–  
433 fungal interactions: ecology, mechanisms and challenges. *FEMS Microbiol Rev* 2018; **42**:  
434 335–352.
- 435 10. Narr A, Nawaz A, Wick LY, Harms H, Chatzinotas A. Soil Viral Communities Vary  
436 Temporally and along a Land Use Transect as Revealed by Virus-Like Particle Counting  
437 and a Modified Community Fingerprinting Approach (fRAPD). *Front Microbiol* 2017; **8**:  
438 1975.
- 439 11. Rosner A, Gutstein R. Adsorption of actinophage Pal 6 to developing mycelium of  
440 *Streptomyces albus*. *Can J Microbiol* 1981; **27**: 254–257.
- 441 12. Ghanem N, E. Stanley C, Harms H, Chatzinotas A, Y. Wick L. Mycelial Effects on Phage  
442 Retention during Transport in a Microfluidic Platform. *Environ Sci & Technol* 2019;  
443 **53**: 11755–11763.

- 444 13. Dennehy JJ. What Ecologists Can Tell Virologists. *Annu Rev Microbiol* 2014; **68**: 117–135.
- 445 14. Hurst CJ, Gerba CP, Cech I. Effects of environmental variables and soil characteristics on  
446 virus survival in soil. *Appl Environ Microbiol* 1980; **40**: 1067–1079.
- 447 15. Yeager JG, O’Brien RT. Enterovirus inactivation in soil. *Appl Environ Microbiol*  
448 1979; **38**: 694 LP – 701.
- 449 16. Schwartz DA, Lindell D. Genetic hurdles limit the arms race between Prochlorococcus and  
450 the T7-like podoviruses infecting them. *ISME J* 2017; **11**: 1836–1851.
- 451 17. Shan J, Ramachandran A, Thanki AM, Vukusic FBI, Barylski J, Clokie MRJ.  
452 Bacteriophages are more virulent to bacteria with human cells than they are in bacterial  
453 culture; insights from HT-29 cells. *Sci Rep* 2018; **8**: 5091.
- 454 18. Chaudhry W, Lee E, Worthy A, Weiss Z, Grabowicz M, Vega NM, et al. Mucoidy, a general  
455 mechanism for maintaining lytic phage in populations of bacteria. *bioRxiv* 2019; 775056.
- 456 19. Yu Z, Schwarz C, Zhu L, Chen L, Shen Y, Yu P. Hitchhiking Behavior in Bacteriophages  
457 Facilitates Phage Infection and Enhances Carrier Bacteria Colonization. *Environ Sci*  
458 *Technol* 2020.
- 459 20. Tarafder AK, von K ugelgen A, Mellul AJ, Schulze U, Aarts DGAL, Bharat TAM. Phage  
460 liquid crystalline droplets form occlusive sheaths that encapsulate and protect infectious  
461 rod-shaped bacteria. *Proc Natl Acad Sci* 2020; **117**: 4724 LP – 4731.
- 462 21. Callaway RM, Ridenour WM. Novel weapons: invasive success and the evolution of  
463 increased competitive ability. *Front Ecol Environ* 2004; **2**: 436–443.
- 464 22. Granato ET, Meiller-Legrand TA, Foster KR. The Evolution and Ecology of Bacterial  
465 Warfare. *Curr Biol* 2019; **29**: R521–R537.
- 466 23. Gama JA, Reis AM, Domingues I, Mendes-Soares H, Matos AM, Dionisio F. Temperate  
467 Bacterial Viruses as Double-Edged Swords in Bacterial Warfare. *PLoS One* 2013; **8**: e59043.
- 468 24. Dragoř A, Andersen AJC, Lozano-Andrade CN, Kempen PJ, Kovacs AT, Strube ML.  
469 Phages carry interbacterial weapons encoded by biosynthetic gene clusters. *Curr Biol* 2021.
- 470 25. Pyřek P, Bacher S, K uhn I, Novoa A, Catford JA, Hulme PE, et al. MAcroecological  
471 Framework for Invasive Aliens (MAFIA): disentangling large-scale context dependence in  
472 biological invasions. *NeoBiota* 15AD; **62**: 407–461.
- 473 26. Blackburn TM, Pyřek P, Bacher S, Carlton JT, Duncan RP, Jarořık V, et al. A proposed  
474 unified framework for biological invasions. *Trends Ecol Evol* 2011; **26**: 333–339.
- 475 27. Richardson DM, Pyřek P. Plant invasions: merging the concepts of species invasiveness  
476 and community invasibility. *Prog Phys Geogr Earth Environ* 2006; **30**: 409–431.

- 477 28. Williamson M. Explaining and predicting the success of invading species at different stages  
478 of invasion. *Biol Invasions* 2006; **8**: 1561–1568.
- 479 29. Demerec M, Adelberg EA, Clark AJ, Hartman PE. A proposal for a uniform nomenclature  
480 in bacterial genetics. *Genetics* 1966; **54**: 61–76.
- 481 30. Dechesne A, Wang G, Gülez G, Or D, Smets BF. Hydration-controlled bacterial motility  
482 and dispersal on surfaces. *Proc Natl Acad Sci* 2010; **107**: 14369 LP – 14372.
- 483 31. Maurhofer M, Keel C, Schnider U, Voisard C, Haas D, Defao G. Influence of enhanced  
484 antibiotic production in *Pseudomonas fluorescens* strain CHA0 on its disease suppressive  
485 capacity. *Phytopathol* 1992.
- 486 32. Schamfuß S, Neu TR, van der Meer JR, Tecon R, Harms H, Wick LY. Impact of mycelia  
487 on the accessibility of fluorene to PAH-degrading bacteria. *Environ Sci Technol* 2013; **47**:  
488 6908–6915.
- 489 33. Fortier L-C, Moineau S. Phage Production and Maintenance of Stocks, Including Expected  
490 Stock Lifetimes BT - Bacteriophages: Methods and Protocols, Volume 1: Isolation,  
491 Characterization, and Interactions. In: Clokie MRJ, Kropinski AM (eds).2009. Humana  
492 Press, Totowa, NJ, pp 203–219.
- 493 34. Mazzocco A, Waddell TE, Lingohr E, Johnson RP. Enumeration of Bacteriophages Using  
494 the Small Drop Plaque Assay System BT - Bacteriophages: Methods and Protocols,  
495 Volume 1: Isolation, Characterization, and Interactions. In: Clokie MRJ, Kropinski AM  
496 (eds).2009. Humana Press, Totowa, NJ, pp 81–85.
- 497 35. Kropinski AM, Mazzocco A, Waddell TE, Lingohr E, Johnson RP. Enumeration of  
498 Bacteriophages by Double Agar Overlay Plaque Assay BT - Bacteriophages: Methods and  
499 Protocols, Volume 1: Isolation, Characterization, and Interactions. In: Clokie MRJ,  
500 Kropinski AM (eds).2009. Humana Press, Totowa, NJ, pp 69–76.
- 501 36. Thanki AM, Taylor-Joyce G, Dowah A, Yakubu Nale J, Malik D, Rebecca Jane Clokie M.  
502 Unravelling the Links between Phage Adsorption and Successful Infection in *Clostridium*  
503 *difficile*. *Viruses* 2018; **10**.
- 504 37. Nair RR, Fiegna F, Velicer GJ. Indirect evolution of social fitness inequalities and  
505 facultative social exploitation. *Proc R Soc B Biol Sci* 2018; **285**: 20180054.
- 506 38. Postma M, Goedhart J. PlotsOfData—A web app for visualizing data together with their  
507 summaries. *PLOS Biol* 2019; **17**: e3000202.
- 508 39. Wood M. Statistical inference using bootstrap confidence intervals. *Significance* 2004; **1**:  
509 180–182.
- 510 40. Walls GL. PsycNET\_Export. *Vertebr eye its Adapt Radiat* . 1982. , 295–307

- 511 41. Frada MJ, Schatz D, Farstey V, Ossolinski JE, Sabanay H, Ben-Dor S, et al. Zooplankton  
512 May Serve as Transmission Vectors for Viruses Infecting Algal Blooms in the Ocean. *Curr*  
513 *Biol* 2014; **24**: 2592–2597.
- 514 42. Frada MJ, Vardi A. Algal viruses hitchhiking on zooplankton across phytoplankton blooms.  
515 *Commun Integr Biol* 2015; **8**: e1029210.
- 516 43. Totsche KU, Kögel-Knabner I. Mobile Organic Sorbent Affected Contaminant Transport  
517 in Soil: Numerical Case Studies for Enhanced and Reduced Mobility. *Vadose Zo J* 2004; **3**:  
518 352–367.
- 519 44. Storms ZJ, Sauvageau D. Modeling tailed bacteriophage adsorption: Insight into  
520 mechanisms. *Virology* 2015; **485**: 355–362.
- 521 45. Bichet MC, Chin WH, Richards W, Lin Y-W, Avellaneda-Franco L, Hernandez CA, et al.  
522 Bacteriophage uptake by mammalian cell layers represents a potential sink that may impact  
523 phage therapy. *iScience* 2021; **24**: 102287.
- 524 46. Lu F, Wu S-H, Hung Y, Mou C-Y. Size Effect on Cell Uptake in Well-Suspended, Uniform  
525 Mesoporous Silica Nanoparticles. *Small* 2009; **5**: 1408–1413.
- 526 47. Shan Y, Harms H, Wick LY. Electric Field Effects on Bacterial Deposition and Transport  
527 in Porous Media. *Environ Sci Technol* 2018; **52**: 14294–14301.
- 528 48. Simon A, Bindschedler S, Job D, Wick LY, Filippidou S, Kooli WM, et al. Exploiting the  
529 fungal highway: development of a novel tool for the in situ isolation of bacteria migrating  
530 along fungal mycelium. *FEMS Microbiol Ecol* 2015; **91**.
- 531 49. Junier P, Cailleau G, Palmieri I, Vallotton C, Trautschold OC, Junier T, et al.  
532 Democratization of fungal highway columns as a tool to investigate bacteria associated with  
533 soil fungi. *FEMS Microbiol Ecol* 2021; **97**.
- 534 50. Furuno S, Remer R, Chatzinotas A, Harms H, Wick LY. Use of mycelia as paths for the  
535 isolation of contaminant-degrading bacteria from soil. *Microb Biotechnol* 2012; **5**: 142–148.
- 536 51. Jiang F, Zhang L, Zhou J, George TS, Feng G. Arbuscular mycorrhizal fungi enhance  
537 mineralisation of organic phosphorus by carrying bacteria along their extraradical hyphae.  
538 *New Phytol* 2021; **230**: 304–315.
- 539 52. Zhang Y, Kastman EK, Guasto JS, Wolfe BE. Fungal networks shape dynamics of bacterial  
540 dispersal and community assembly in cheese rind microbiomes. *Nat Commun* 2018; **9**: 336.
- 541 53. Ping D, Wang T, Fraebel DT, Maslov S, Sneppen K, Kuehn S. Hitchhiking, collapse, and  
542 contingency in phage infections of migrating bacterial populations. *ISME J* 2020; **14**: 2007–  
543 2018.
- 544 54. Testa S, Berger S, Piccardi P, Oechsli F, Resch G, Mitri S. Spatial structure affects phage

- 545 efficacy in infecting dual-strain biofilms of *Pseudomonas aeruginosa*. *Commun Biol* 2019;  
546 **2**: 405.
- 547 55. May T, Tsuruta K, Okabe S. Exposure of conjugative plasmid carrying *Escherichia coli*  
548 biofilms to male-specific bacteriophages. *ISME J* 2011; **5**: 771–775.
- 549 56. Abedon ST. Phage “delay” towards enhancing bacterial escape from biofilms: a more  
550 comprehensive way of viewing resistance to bacteriophages. *AIMS Microbiol* 2017; **3**: 186.
- 551 57. Chatterjee A, Willett JLE, Dunny GM, Duerkop BA. Phage infection and sub-lethal  
552 antibiotic exposure mediate *Enterococcus faecalis* type VII secretion system dependent  
553 inhibition of bystander bacteria. *PLOS Genet* 2021; **17**: e1009204.
- 554 58. Berthold T, Centler F, Hübschmann T, Remer R, Thullner M, Harms H, et al. Mycelia as a  
555 focal point for horizontal gene transfer among soil bacteria. *Sci Rep* 2016; **6**: 36390.
- 556 59. Chantrey J, Dale TD, Read JM, White S, Whitfield F, Jones D, et al. European red squirrel  
557 population dynamics driven by squirrelpox at a gray squirrel invasion interface. *Ecol Evol*  
558 2014; **4**: 3788–3799.
- 559 60. Hudson P, Greenman J. Competition mediated by parasites: biological and theoretical  
560 progress. *Trends Ecol Evol* 1998; **13**: 387–390.

561
